# Supplementary material
Source: ML conference proceedings conference paper supplement (https://openaccess.thecvf.com/content/WACV2024/html/Purohit_ConeQuest_A_Benchmark_WACV_2024_paper.html)
Supplement: Supplementary file 1 [file Purohit_ConeQuest_A_Benchmark_WACV_2024_supplemental.pdf]

# ConeQuest: A Benchmark for Cone Segmentation on Mars (Supplementary Material)

Mirali Purohit    Jacob Adler    Hannah Kerner  
Arizona State University  
{mpurohi3, jbadler2, hkerner}@asu.edu

## A. Visualization of Predictions

This section discusses the visualization of predictions from models and compares inter-region and inter-size category results.

### A.1. Single-region Evaluation

Figure 1 shows the visualization of prediction for the evaluation of in-distribution data for single-region training. From Figure 1, it can be observed that Isidis Planitia (IP) performs very well compared to Acidalia Planitia (AP) and Hypanis (HP). Predictions of HP are distorted and the model is not able to predict all the cones from the input sample. As discussed in Section 6.2.1 (main paper), this can be explained by the fact that IP has very dense cones per patch, i.e., an average of 3.52 cones per patch while AP and HP have 1.92 and 2.08 cones, respectively. Also, IP cones have a very different appearance than their surface, i.e., the distinct appearance of cones on the IP surface contributes to easier cone segmentation in this region. For AP and HP, it can be seen from Figure 1 that cones in these two regions are difficult to distinguish from their surface and hence it results in low performance. Also, as discussed in Section 4 and 6.2.1 (main paper) HP cones have more variability which is the cause for low performance.

### A.2. Single-category Evaluation

Figure 2 shows the visualization of prediction for evaluating in-distribution data for single-size category training. From Figure 2, it is evident that all models are working better for Large size compared to Medium and Small. Moreover, predictions show improvement as we transition from small to large size. The reason behind this is that the model gets very little information while training only for the small-size category which leads to more FN pixels in prediction. Also, an increase in FN pixels does not only impact pixel-based metrics but highly affects instance-level metrics. This scenario can be observed from Table 3, the range of Object accuracy and Object IoU for small are 16-22 and 22-29, respectively; while for large, this range is 59-64 and 50-60. This indicates

although models are trained on an equal amount of data for all 3 size categories, models struggle on smaller size.

## B. Additional Results and Analysis

In this section, we present all the additional results encompassing the performance of each model on in-distribution ( $\mathcal{D}_{id}$ ), and the detailed analysis of results on out-of-distribution ( $\mathcal{D}_{ood}$ ). All results are for  $\mathcal{T}_{pn}$  (when the model is trained on positive as well as negative samples), denoting the scenario where a model is trained on combined positive and negative samples.

### B.1. Results on $\mathcal{D}_{id}$ and $\mathcal{D}_{ood}$

For BM-1, Table 1 and 2 provide detailed results for each model for single-region and multi-region training, respectively. For BM-2, Table 3 and 4 provide detailed results for each model for single-category and multi-category training, respectively. In these tables, the *highlighted* rows indicate results on  $\mathcal{D}_{id}$ , while the *non-highlighted* rows indicate results on the  $\mathcal{D}_{ood}$  for both BMs. Detailed analysis on  $\mathcal{D}_{id}$  for both BMs can be found in Section 6 (main paper).

### B.2. Analysis on $\mathcal{D}_{ood}$

Here, we provide a detailed analysis of the results on  $\mathcal{D}_{ood}$  for both BMs. As discussed in Section 6.2 (main paper), and as observed from Table 1, the models demonstrate lower performance on  $\mathcal{D}_{ood}$  compared to  $\mathcal{D}_{id}$ , with an average pixel IoU of 12.67 and 21.11 across all models for BM-1 using single-region and multi-region training, respectively. In contrast, the performance on  $\mathcal{D}_{id}$  yields an average IoU of 52.06 and 49.68 for the respective configurations. These results indicate that the models do not generalize well to  $\mathcal{D}_{ood}$  regions. A similar observation can be made for BM-2 on  $\mathcal{D}_{ood}$ , where the average pixel IoU across all models is 25.37 and 30.00 for single-category and multi-category training, respectively. Meanwhile, the performance on  $\mathcal{D}_{id}$  yields an average IoU of 42.88 and 41.08 for the corresponding configurations. This further demonstrates that the models struggle to generalize to  $\mathcal{D}_{ood}$  categories. Overall, this indicates that

the model’s generalization ability to both out-of-distribution regions and categories is limited, as shown by the lower IoU compared to performance on  $\mathcal{D}_{id}$ .

Interestingly, for BM-2, the medium category exhibits relatively better performance when the model is trained on either small or large categories, or trained on a combination of small and large categories (denoted as  $S + L$  in tables). This can be attributed to the cone size in the medium category being closer in scale to both small and large categories. As a result, the model is better at handling the medium category when it is unseen during evaluation.

### C. $\mathcal{T}_{pn}$ vs. $\mathcal{T}_p$

In this section, we aim to provide a detailed discussion on having an advantage of incorporating negative samples during training. To accomplish this, we provide the performance of the model on  $\mathcal{T}_p$  (when the model is trained only on positive samples), denoting the scenario where the model is exclusively trained on positive samples.

#### C.1. Evaluation on BM-1

Table 5 and 6 show the results of  $\mathcal{T}_p$  for BM-1 on single-region and multi-region training, respectively. Similarly to  $\mathcal{T}_{pn}$ , the *highlighted* rows in these tables represent results on  $\mathcal{D}_{id}$ , while the *non-highlighted* rows represent results on  $\mathcal{D}_{ood}$ .

**Performance on Single-region training:** When evaluating cone-patches for  $\mathcal{T}_p$  on single-region training, we observe an average increase in pixel IoU of 4.18 on  $\mathcal{D}_{id}$  and 10.65 on  $\mathcal{D}_{ood}$  (across all models) compared to  $\mathcal{T}_{pn}$ . However, we do not observe significant improvements in other metrics. For instance, pixel precision shows a performance drop of 4.87 on  $\mathcal{D}_{id}$  and 23.43 on  $\mathcal{D}_{ood}$  for  $\mathcal{T}_p$  compared to  $\mathcal{T}_{pn}$ . Furthermore, we observe that the performance on non-cone patches for  $\mathcal{T}_p$  on  $\mathcal{D}_{id}$  shows the degradation of 1.85 in  $A_{FP}$  compared to  $\mathcal{T}_{pn}$ . Similarly, on  $\mathcal{D}_{ood}$ , the performance drop for  $A_{FP}$  is 8.26 for  $\mathcal{T}_p$  compared to  $\mathcal{T}_{pn}$ .

**Performance on Multi-region training:** Evaluation of model performance on cone-patches for single-region training, we can observe an average increase of 4.08 in pixel IoU on  $\mathcal{D}_{id}$  and 14.21 on  $\mathcal{D}_{ood}$  for  $\mathcal{T}_p$  compared to  $\mathcal{T}_{pn}$ . However, other metrics do not show significant improvements. Whereas, pixel precision decreases by 7.54 on  $\mathcal{D}_{id}$  and 18.07 on  $\mathcal{D}_{ood}$  for  $\mathcal{T}_p$  compared  $\mathcal{T}_{pn}$ . Additionally, the performance of non-cone patches deteriorates for  $\mathcal{T}_p$ , with  $A_{FP}$  showing a degradation of 2.35 on  $\mathcal{D}_{id}$  and 4.03 on  $\mathcal{D}_{ood}$  compared to  $\mathcal{T}_{pn}$ . From this, we can see that although cone-patches benefit from improved pixel IoU on both  $\mathcal{D}_{id}$  and  $\mathcal{D}_{ood}$ , there is a noticeable decline in pixel precision, and the performance of non-cone patches.

#### C.2. Evaluation on BM-2

Here, we can see similar observations as BM-1. Table 7 and 8 show results of  $\mathcal{T}_p$  for BM-2 on single-category and multi-category training, respectively.

**Performance on Single-category training:** Similar to the single-region training, evaluation of models on cone-patches for  $\mathcal{T}_p$  show an increase in an average pixel IoU by 4.86 (across all models) on  $\mathcal{D}_{id}$  and 6.66 (average across all models) on  $\mathcal{D}_{ood}$  compared to  $\mathcal{T}_{pn}$  for single-category training. However, there is no such significant improvement for other metrics. For instance, pixel precision shows performance drop by 7.08 on  $\mathcal{D}_{id}$  and 9.12 on  $\mathcal{D}_{ood}$  for  $\mathcal{T}_p$  compared to  $\mathcal{T}_{pn}$ . Moreover, evaluation of models on non-cone patches exhibits performance deterioration of  $A_{FP}$  by 1.44 and 1.39 on  $\mathcal{T}_p$  compared to  $\mathcal{T}_{pn}$  on  $\mathcal{D}_{id}$  and  $\mathcal{D}_{ood}$ , respectively.

**Performance on Multi-category training:** Upon evaluating models on cone-patches for single-category training for  $\mathcal{T}_p$ , we observe an increase in pixel IoU of 6.62 (average across all models) on  $\mathcal{D}_{id}$  and 8.11 on  $\mathcal{D}_{ood}$  when compared to  $\mathcal{T}_{pn}$ . However, we do not observe significant improvements in other metrics. Even, pixel precision demonstrates a performance drop of 7.15 on  $\mathcal{D}_{id}$  and 9.93 on  $\mathcal{D}_{ood}$  for  $\mathcal{T}_p$  compared to  $\mathcal{T}_{pn}$ . Furthermore, considering the performance on non-cone patches, we observe a degradation of 2.06 in  $A_{FP}$  compared to  $\mathcal{T}_{pn}$  on  $\mathcal{D}_{id}$ . Similarly, on  $\mathcal{D}_{ood}$ , the deterioration in performance for  $A_{FP}$  is 1.3 for  $\mathcal{T}_p$  compared to  $\mathcal{T}_{pn}$ .

Based on the aforementioned analysis in C.1 and C.1, it can be concluded that excluding negative samples has a positive impact on the performance of positive samples (cone-patches), but it adversely affects the performance of non-cone patches. This is evident from the degraded pixel precision, indicating that the model generates more false positives due to insufficient information about “*what is not a cone*”. Furthermore, the performance drop on non-cone patches is not desirable as it increases the workload for planetary scientists, since they would need to filter out the increased number of falsely annotated cones generated by the model.

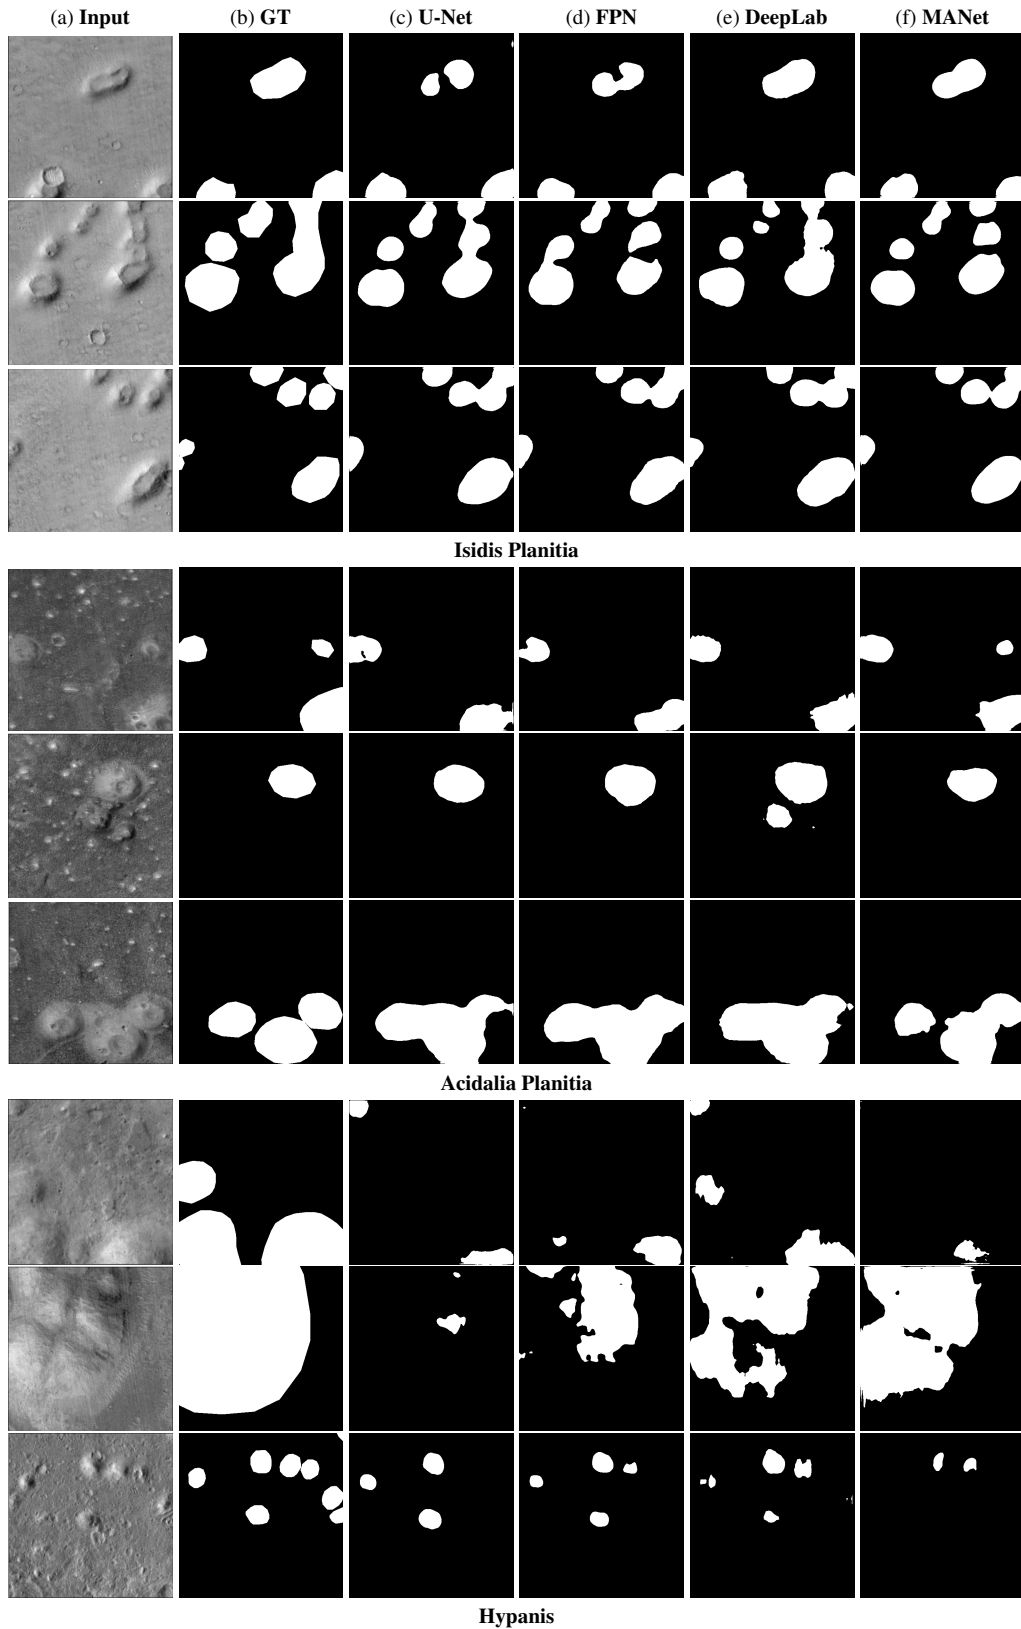

Figure 1. Illustration of predictions of in-distribution evaluation for single-region training (BM-1). Columns c, d, e, and f show prediction from all models with their corresponding Input (column a) and Ground Truth (GT) (column b).

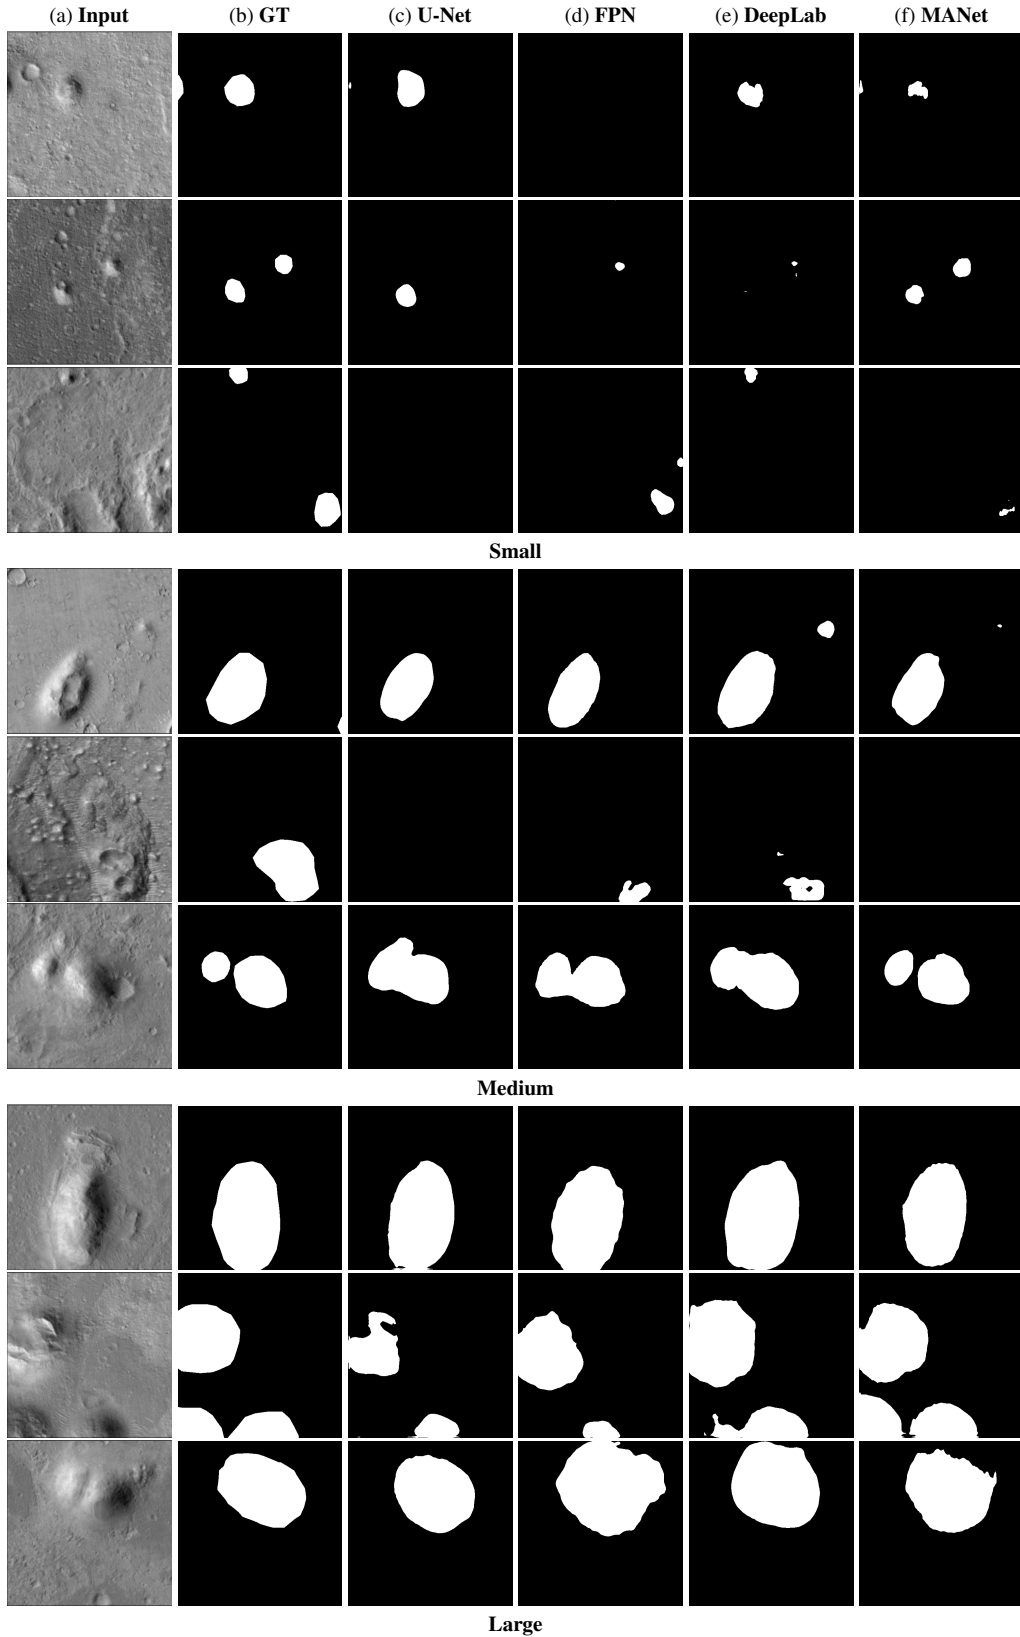

Figure 2. Illustration of predictions of in-distribution evaluation for single-size category training (BM-2). Columns c, d, e, and f show prediction from all models with their corresponding Input (column a) and Ground Truth (GT) (column b).

| Training Region | Testing Region | Training Model | Cone     |           |                |                 |              |                  |       |            |                 |                  |               | Non-cone |
|-----------------|----------------|----------------|----------|-----------|----------------|-----------------|--------------|------------------|-------|------------|-----------------|------------------|---------------|----------|
|                 |                |                | Mask IoU | Pixel IoU | Pixel Accuracy | Pixel Precision | Pixel Recall | Panoptic Quality | mAP   | Object IoU | Object Accuracy | Object Precision | Object Recall | $A_{FP}$ |
| IP              | IP             | U-Net          | 63.90    | 67.99     | 96.66          | 79.56           | 83.69        | 54.38            | 36.67 | 74.17      | 59.83           | 69.13            | 76.07         | 0.00     |
|                 |                | FPN            | 69.06    | 69.49     | 96.41          | 83.35           | 81.44        | 58.47            | 31.85 | 77.04      | 65.34           | 76.97            | 78.76         | 0.00     |
|                 |                | DeepLab        | 62.11    | 67.28     | 96.80          | 85.41           | 76.98        | 53.50            | 32.29 | 73.79      | 58.58           | 70.08            | 72.61         | 0.00     |
|                 |                | MA-Net         | 64.17    | 66.90     | 96.77          | 85.82           | 74.24        | 53.12            | 31.80 | 72.17      | 59.08           | 70.91            | 74.59         | 0.00     |
|                 | AP             | U-Net          | 6.72     | 3.99      | 89.58          | 28.60           | 9.04         | 1.75             | 0.67  | 2.19       | 2.47            | 3.70             | 2.47          | 5.70     |
|                 |                | FPN            | 15.03    | 11.60     | 79.84          | 16.97           | 34.43        | 1.80             | 0.96  | 4.39       | 1.98            | 2.16             | 5.56          | 19.60    |
|                 |                | DeepLab        | 7.82     | 4.87      | 92.75          | 74.96           | 5.20         | 1.46             | 0.54  | 2.93       | 1.23            | 3.70             | 1.23          | 7.45     |
|                 |                | MA-Net         | 16.24    | 12.69     | 89.86          | 35.54           | 24.30        | 1.97             | 0.77  | 8.93       | 1.97            | 3.06             | 8.02          | 10.33    |
|                 | HP             | U-Net          | 25.02    | 23.29     | 88.14          | 69.08           | 29.01        | 11.99            | 3.83  | 23.37      | 13.56           | 16.18            | 22.41         | 1.09     |
|                 |                | FPN            | 34.35    | 29.32     | 87.03          | 53.51           | 48.34        | 13.76            | 3.75  | 34.96      | 13.4            | 15.41            | 34.22         | 5.13     |
|                 |                | DeepLab        | 24.01    | 21.57     | 87.36          | 70.05           | 28.67        | 11.47            | 3.34  | 24.51      | 12.79           | 15.94            | 23.72         | 1.11     |
|                 |                | MA-Net         | 28.40    | 27.95     | 89.07          | 72.11           | 35.54        | 14.46            | 4.45  | 30.82      | 15.95           | 18.64            | 30.86         | 1.55     |
| AP              | IP             | U-Net          | 8.37     | 11.21     | 89.53          | 46.7            | 19.71        | 4.75             | 2.16  | 11.28      | 5.02            | 7.65             | 8.80          | 0.70     |
|                 |                | FPN            | 11.89    | 10.83     | 91.32          | 70.53           | 12.1         | 5.42             | 3.21  | 13.73      | 5.93            | 11.67            | 8.06          | 0.00     |
|                 |                | DeepLab        | 0.69     | 1.53      | 90.36          | 95.16           | 1.86         | 0.87             | 0.22  | 2.18       | 0.93            | 1.23             | 1.85          | 0.00     |
|                 |                | MA-Net         | 0.00     | 0.00      | 90.65          | 100.00          | 0.00         | 0.00             | 0.00  | 0.00       | 0.00            | 0.00             | 0.00          | 0.00     |
|                 | AP             | U-Net          | 50.28    | 49.77     | 96.32          | 85.50           | 57.78        | 44.83            | 19.82 | 58.10      | 51.45           | 62.16            | 57.35         | 0.08     |
|                 |                | FPN            | 47.96    | 46.85     | 96.22          | 80.55           | 56.05        | 38.62            | 20.43 | 50.68      | 45.49           | 54.94            | 50.56         | 0.38     |
|                 |                | DeepLab        | 47.85    | 49.9      | 96.58          | 79.57           | 58.10        | 40.45            | 16.68 | 51.67      | 42.59           | 51.17            | 52.10         | 0.38     |
|                 |                | MA-Net         | 34.42    | 36.81     | 95.72          | 86.24           | 39.15        | 31.74            | 20.84 | 36.73      | 38.27           | 40.74            | 43.46         | 0.06     |
|                 | HP             | U-Net          | 2.34     | 1.63      | 86.52          | 75.76           | 1.93         | 0.67             | 1.28  | 1.69       | 0.73            | 1.79             | 0.98          | 0.35     |
|                 |                | FPN            | 4.27     | 3.39      | 86.79          | 86.01           | 3.81         | 0.86             | 1.61  | 1.19       | 0.93            | 1.61             | 1.11          | 0.13     |
|                 |                | DeepLab        | 1.63     | 1.62      | 86.47          | 91.31           | 2.73         | 0.49             | 0.70  | 0.73       | 0.60            | 0.78             | 0.90          | 0.07     |
|                 |                | MA-Net         | 1.50     | 1.67      | 86.42          | 95.25           | 2.90         | 0.56             | 1.73  | 1.30       | 0.50            | 0.55             | 1.33          | 0.05     |
| HP              | IP             | U-Net          | 25.77    | 18.64     | 92.21          | 97.30           | 19.69        | 15.67            | 9.72  | 25.68      | 17.64           | 28.46            | 19.81         | 0.00     |
|                 |                | FPN            | 38.32    | 33.07     | 93.60          | 97.69           | 34.49        | 26.41            | 15.83 | 39.63      | 28.72           | 41.05            | 31.31         | 0.00     |
|                 |                | DeepLab        | 27.18    | 20.23     | 92.26          | 92.17           | 21.28        | 14.65            | 9.74  | 25.64      | 15.40           | 28.70            | 17.35         | 0.00     |
|                 |                | MA-Net         | 5.00     | 1.80      | 88.07          | 93.15           | 6.34         | 2.45             | 1.63  | 6.6        | 2.44            | 3.00             | 6.79          | 0.00     |
|                 | AP             | U-Net          | 24.79    | 21.68     | 93.18          | 79.08           | 24.15        | 16.27            | 2.17  | 22.93      | 20.80           | 25.31            | 24.07         | 11.36    |
|                 |                | FPN            | 11.29    | 11.08     | 92.80          | 91.06           | 11.42        | 5.44             | 1.29  | 9.14       | 7.22            | 8.64             | 9.88          | 7.56     |
|                 |                | DeepLab        | 20.26    | 22.00     | 94.27          | 81.52           | 24.92        | 13.23            | 3.32  | 21.51      | 16.17           | 19.14            | 23.46         | 7.06     |
|                 |                | MA-Net         | 8.00     | 8.44      | 89.93          | 70.04           | 10.36        | 2.06             | 0.68  | 4.08       | 2.59            | 3.09             | 4.94          | 7.21     |
|                 | HP             | U-Net          | 39.66    | 38.70     | 91.22          | 83.16           | 45.07        | 29.48            | 12.49 | 39.69      | 34.82           | 42.93            | 39.57         | 0.43     |
|                 |                | FPN            | 43.08    | 43.87     | 92.31          | 84.70           | 50.32        | 33.50            | 17.35 | 45.47      | 39.92           | 47.88            | 46.11         | 0.55     |
|                 |                | DeepLab        | 43.86    | 45.94     | 92.63          | 79.34           | 56.01        | 33.11            | 14.07 | 47.30      | 38.82           | 44.29            | 48.95         | 0.65     |
|                 |                | MA-Net         | 38.94    | 41.20     | 92.18          | 83.65           | 48.54        | 29.56            | 13.66 | 41.19      | 34.30           | 39.79            | 42.60         | 0.35     |

Table 1. Results for BM-1 on  $\mathcal{D}_{id}$  (highlighted) and  $\mathcal{D}_{ood}$  for single-region  $\mathcal{T}_{pn}$ .

| Training Region | Testing Region | Training Model | Cone     |           |                |                 |              |                  |       |            |                 |                  |               | Non-cone |
|-----------------|----------------|----------------|----------|-----------|----------------|-----------------|--------------|------------------|-------|------------|-----------------|------------------|---------------|----------|
|                 |                |                | Mask IoU | Pixel IoU | Pixel Accuracy | Pixel Precision | Pixel Recall | Panoptic Quality | mAP   | Object IoU | Object Accuracy | Object Precision | Object Recall | $A_{FP}$ |
| IP + AP         | IP             | U-Net          | 63.30    | 67.90     | 96.81          | 91.35           | 72.81        | 52.40            | 32.59 | 74.20      | 57.41           | 68.76            | 70.24         | 0.00     |
|                 |                | FPN            | 66.92    | 69.44     | 96.70          | 82.85           | 80.91        | 59.10            | 36.76 | 76.35      | 67.03           | 76.81            | 81.1          | 0.00     |
|                 |                | DeepLab        | 59.87    | 63.70     | 96.29          | 83.85           | 72.98        | 48.93            | 28.91 | 72.69      | 53.60           | 65.31            | 61.99         | 0.00     |
|                 |                | MA-Net         | 66.66    | 69.29     | 96.91          | 82.92           | 79.46        | 59.41            | 38.32 | 76.01      | 65.50           | 77.34            | 77.40         | 0.00     |
|                 | AP             | U-Net          | 48.10    | 47.60     | 96.26          | 90.48           | 52.34        | 38.05            | 20.69 | 54.90      | 42.07           | 51.05            | 55.00         | 0.09     |
|                 |                | FPN            | 36.08    | 35.38     | 95.46          | 94.01           | 38.52        | 28.75            | 19.82 | 38.11      | 33.58           | 39.20            | 40.37         | 0.23     |
|                 |                | DeepLab        | 52.99    | 55.44     | 97.25          | 89.79           | 61.68        | 43.66            | 22.56 | 63.99      | 45.62           | 53.33            | 60.25         | 0.88     |
|                 |                | MA-Net         | 44.18    | 44.61     | 96.45          | 86.35           | 48.84        | 33.92            | 20.61 | 45.09      | 37.41           | 45.00            | 46.05         | 0.03     |
|                 | HP             | U-Net          | 8.75     | 6.92      | 87.11          | 84.86           | 7.28         | 4.04             | 2.54  | 7.03       | 5.35            | 8.02             | 6.56          | 0.19     |
|                 |                | FPN            | 14.42    | 12.35     | 87.46          | 84.76           | 13.28        | 7.15             | 3.66  | 10.83      | 9.71            | 12.02            | 11.48         | 0.49     |
|                 |                | DeepLab        | 18.25    | 19.55     | 88.28          | 84.25           | 20.93        | 11.43            | 4.62  | 19.16      | 13.76           | 16.49            | 18.69         | 0.35     |
|                 |                | MA-Net         | 4.26     | 3.97      | 86.82          | 97.59           | 4.24         | 2.13             | 6.29  | 3.15       | 2.72            | 3.22             | 3.33          | 0.14     |
| HP + IP         | IP             | U-Net          | 58.90    | 63.58     | 96.16          | 78.02           | 79.80        | 47.24            | 25.91 | 70.93      | 50.80           | 65.79            | 58.76         | 0.00     |
|                 |                | FPN            | 68.33    | 67.24     | 96.56          | 83.23           | 78.00        | 57.53            | 34.56 | 75.30      | 63.97           | 78.40            | 71.6          | 0.00     |
|                 |                | DeepLab        | 59.32    | 61.55     | 96.09          | 83.42           | 73.72        | 47.08            | 22.96 | 71.52      | 50.38           | 65.95            | 61.28         | 0.00     |
|                 |                | MA-Net         | 58.44    | 58.90     | 96.15          | 88.61           | 66.80        | 48.71            | 31.32 | 68.97      | 53.64           | 69.11            | 60.55         | 0.00     |
|                 | AP             | U-Net          | 24.45    | 21.61     | 94.28          | 87.44           | 22.02        | 12.93            | 4.08  | 22.16      | 16.89           | 20.49            | 21.11         | 6.41     |
|                 |                | FPN            | 12.97    | 11.01     | 93.31          | 89.34           | 12.31        | 10.50            | 1.82  | 15.01      | 12.65           | 16.67            | 15.43         | 4.30     |
|                 |                | DeepLab        | 20.19    | 20.21     | 93.28          | 79.97           | 22.91        | 15.90            | 2.29  | 25.80      | 19.60           | 27.38            | 24.69         | 10.32    |
|                 |                | MA-Net         | 9.58     | 9.63      | 93.18          | 83.88           | 10.36        | 1.86             | 1.52  | 4.65       | 1.85            | 2.78             | 4.94          | 8.10     |
|                 | HP             | U-Net          | 46.02    | 45.84     | 92.5           | 78.06           | 55.89        | 33.59            | 15.40 | 46.38      | 39.58           | 48.59            | 46.29         | 1.19     |
|                 |                | FPN            | 44.16    | 43.84     | 92.28          | 80.92           | 52.14        | 33.77            | 16.23 | 46.02      | 38.89           | 46.49            | 46.27         | 0.41     |
|                 |                | DeepLab        | 41.75    | 45.38     | 92.34          | 77.02           | 56.27        | 32.49            | 11.93 | 46.51      | 37.34           | 42.37            | 47.45         | 0.77     |
|                 |                | MA-Net         | 39.35    | 40.72     | 91.99          | 81.88           | 48.35        | 28.94            | 13.46 | 41.63      | 33.56           | 39.69            | 42.51         | 0.28     |
| AP + HP         | IP             | U-Net          | 47.66    | 46.23     | 94.76          | 89.93           | 51.45        | 32.25            | 19.72 | 52.97      | 35.36           | 56.42            | 41.07         | 0.00     |
|                 |                | FPN            | 58.25    | 57.70     | 95.14          | 81.41           | 71.36        | 44.79            | 24.25 | 69.93      | 48.20           | 70.31            | 53.92         | 0.00     |
|                 |                | DeepLab        | 8.63     | 7.02      | 91.40          | 96.10           | 7.04         | 3.58             | 5.73  | 6.82       | 4.32            | 8.89             | 4.88          | 0.00     |
|                 |                | MA-Net         | 36.53    | 37.11     | 93.56          | 90.40           | 41.35        | 24.22            | 15.05 | 45.95      | 22.82           | 36.62            | 30.63         | 0.00     |
|                 | AP             | U-Net          | 35.61    | 33.17     | 95.29          | 89.55           | 35.46        | 27.31            | 8.50  | 39.26      | 32.97           | 41.67            | 37.90         | 2.65     |
|                 |                | FPN            | 45.38    | 44.81     | 96.22          | 90.60           | 49.74        | 38.21            | 17.40 | 47.96      | 44.81           | 56.30            | 46.67         | 0.70     |
|                 |                | DeepLab        | 16.92    | 15.93     | 93.82          | 94.27           | 16.66        | 12.66            | 2.44  | 17.09      | 17.20           | 21.11            | 18.52         | 1.20     |
|                 |                | MA-Net         | 48.19    | 50.78     | 96.75          | 83.64           | 58.69        | 35.11            | 17.87 | 46.51      | 36.55           | 40.12            | 49.01         | 1.29     |
|                 | HP             | U-Net          | 44.36    | 45.08     | 92.58          | 81.46           | 53.53        | 33.73            | 13.71 | 47.84      | 38.91           | 48.31            | 46.44         | 1.59     |
|                 |                | FPN            | 44.71    | 45.79     | 92.44          | 81.59           | 55.21        | 34.30            | 16.53 | 48.14      | 39.63           | 47.80            | 48.00         | 1.10     |
|                 |                | DeepLab        | 35.33    | 37.64     | 91.48          | 84.88           | 42.92        | 26.73            | 13.08 | 39.63      | 31.39           | 37.54            | 38.22         | 0.52     |
|                 |                | MA-Net         | 46.22    | 47.96     | 92.48          | 77.66           | 60.00        | 35.27            | 12.72 | 52.77      | 39.46           | 45.47            | 53.26         | 1.11     |
| IP + AP + HP    | IP             | U-Net          | 63.46    | 62.33     | 96.27          | 81.92           | 76.44        | 53.00            | 31.88 | 71.54      | 59.01           | 76.71            | 64.98         | 0.00     |
|                 |                | FPN            | 65.94    | 67.91     | 96.62          | 85.96           | 78.00        | 56.60            | 33.54 | 76.45      | 62.42           | 78.40            | 66.03         | 0.00     |
|                 |                | DeepLab        | 34.08    | 31.70     | 93.72          | 97.37           | 32.93        | 23.20            | 12.38 | 38.05      | 27.17           | 39.51            | 31.80         | 0.00     |
|                 |                | MA-Net         | 59.90    | 63.50     | 96.44          | 91.52           | 67.92        | 49.38            | 29.83 | 69.09      | 56.98           | 69.14            | 65.00         | 0.00     |
|                 | AP             | U-Net          | 47.82    | 42.56     | 95.99          | 82.38           | 47.09        | 42.49            | 12.88 | 57.74      | 48.89           | 62.04            | 56.23         | 2.27     |
|                 |                | FPN            | 48.26    | 45.91     | 96.51          | 87.12           | 51.16        | 40.66            | 17.63 | 52.17      | 45.56           | 54.57            | 50.37         | 0.76     |
|                 |                | DeepLab        | 37.78    | 40.50     | 95.91          | 86.91           | 45.30        | 33.36            | 11.56 | 45.32      | 38.27           | 43.74            | 45.93         | 4.55     |
|                 |                | MA-Net         | 49.94    | 54.05     | 97.20          | 83.96           | 59.85        | 45.62            | 23.38 | 59.47      | 49.20           | 55.00            | 57.47         | 0.45     |
|                 | HP             | U-Net          | 43.28    | 45.23     | 92.14          | 79.73           | 55.20        | 33.74            | 11.50 | 48.29      | 40.17           | 46.34            | 49.30         | 0.93     |
|                 |                | FPN            | 48.39    | 49.13     | 92.98          | 82.66           | 58.38        | 37.96            | 17.77 | 50.42      | 44.69           | 53.45            | 52.18         | 1.36     |
|                 |                | DeepLab        | 37.93    | 39.83     | 91.63          | 81.11           | 49.48        | 27.14            | 11.14 | 39.53      | 30.97           | 36.07            | 40.91         | 0.50     |
|                 |                | MA-Net         | 42.44    | 44.13     | 92.46          | 82.88           | 51.18        | 32.57            | 13.42 | 45.70      | 38.17           | 43.90            | 48.02         | 0.35     |

Table 2. Results for BM-1 on  $\mathcal{D}_{id}$  (highlighted) and  $\mathcal{D}_{ood}$  for multi-region  $\mathcal{T}_{pn}$ .

| Training Category | Testing Category | Training Model | Cone     |           |                |                 |              |                  |       |            |                 |                  |               | Non-cone |
|-------------------|------------------|----------------|----------|-----------|----------------|-----------------|--------------|------------------|-------|------------|-----------------|------------------|---------------|----------|
|                   |                  |                | Mask IoU | Pixel IoU | Pixel Accuracy | Pixel Precision | Pixel Recall | Panoptic Quality | mAP   | Object IoU | Object Accuracy | Object Precision | Object Recall | $A_{FP}$ |
| S                 | S                | U-Net          | 31.28    | 28.64     | 97.59          | 74.69           | 37.39        | 19.43            | 11.08 | 29.46      | 22.53           | 31.36            | 27.35         | 0.29     |
|                   |                  | FPN            | 25.06    | 25.06     | 97.51          | 76.26           | 31.68        | 15.64            | 8.27  | 23.31      | 17.89           | 21.62            | 22.65         | 0.05     |
|                   |                  | DeepLab        | 22.86    | 22.70     | 97.64          | 78.85           | 26.56        | 13.93            | 9.58  | 22.13      | 16.39           | 22.06            | 21.55         | 0.12     |
|                   |                  | MA-Net         | 27.41    | 26.99     | 97.70          | 76.21           | 33.96        | 17.56            | 12.09 | 25.93      | 20.55           | 25.74            | 27.38         | 0.03     |
|                   | M                | U-Net          | 37.26    | 33.50     | 92.08          | 77.37           | 40.56        | 25.43            | 12.36 | 39.01      | 31.46           | 40.73            | 35.74         | 0.15     |
|                   |                  | FPN            | 27.98    | 24.97     | 91.47          | 88.86           | 26.86        | 17.51            | 12.50 | 25.61      | 21.62           | 27.61            | 25.46         | 0.03     |
|                   |                  | DeepLab        | 28.97    | 27.74     | 91.90          | 91.70           | 29.37        | 20.02            | 10.37 | 27.71      | 25.98           | 31.30            | 29.45         | 0.05     |
|                   |                  | MA-Net         | 27.14    | 27.18     | 91.76          | 93.03           | 29.01        | 20.33            | 10.09 | 30.69      | 23.22           | 26.82            | 29.64         | 0.02     |
|                   | L                | U-Net          | 17.72    | 15.21     | 79.38          | 84.34           | 15.92        | 9.93             | 7.22  | 15.97      | 11.72           | 14.02            | 14.30         | 0.11     |
|                   |                  | FPN            | 15.51    | 14.86     | 79.70          | 91.64           | 15.33        | 9.43             | 5.93  | 13.24      | 12.78           | 15.02            | 14.91         | 0.01     |
|                   |                  | DeepLab        | 14.93    | 13.61     | 78.72          | 89.78           | 13.99        | 8.92             | 7.08  | 13.22      | 11.02           | 13.23            | 14.14         | 0.10     |
|                   |                  | MA-Net         | 9.81     | 9.46      | 78.01          | 93.44           | 9.97         | 6.96             | 4.66  | 9.46       | 9.08            | 9.54             | 12.39         | 0.05     |
| M                 | S                | U-Net          | 18.73    | 17.50     | 96.96          | 75.53           | 22.02        | 9.95             | 7.84  | 15.16      | 12.15           | 16.67            | 14.69         | 0.57     |
|                   |                  | FPN            | 26.27    | 25.42     | 97.30          | 69.99           | 33.05        | 16.84            | 10.43 | 24.24      | 20.04           | 28.44            | 21.97         | 0.22     |
|                   |                  | DeepLab        | 25.9     | 24.83     | 97.01          | 66.84           | 32.77        | 16.56            | 11.03 | 28.60      | 18.60           | 28.65            | 23.45         | 0.48     |
|                   |                  | MA-Net         | 29.04    | 28.68     | 97.35          | 70.84           | 37.84        | 17.77            | 11.37 | 28.71      | 19.98           | 28.59            | 25.22         | 0.31     |
|                   | M                | U-Net          | 36.26    | 33.19     | 92.43          | 81.92           | 37.17        | 20.92            | 12.54 | 36.28      | 24.23           | 36.05            | 28.58         | 0.35     |
|                   |                  | FPN            | 37.53    | 36.01     | 92.45          | 81.41           | 41.07        | 25.14            | 13.28 | 37.48      | 30.31           | 39.71            | 34.58         | 0.23     |
|                   |                  | DeepLab        | 38.29    | 40.80     | 92.82          | 80.68           | 48.21        | 29.42            | 10.96 | 44.83      | 35.23           | 43.75            | 43.03         | 0.31     |
|                   |                  | MA-Net         | 47.28    | 48.65     | 93.89          | 82.04           | 55.15        | 35.21            | 13.83 | 54.01      | 40.83           | 50.15            | 49.81         | 0.49     |
|                   | L                | U-Net          | 34.11    | 33.40     | 83.53          | 90.37           | 34.82        | 21.58            | 14.30 | 29.02      | 28.02           | 32.43            | 32.11         | 0.35     |
|                   |                  | FPN            | 36.97    | 34.83     | 83.11          | 90.43           | 36.62        | 26.31            | 15.41 | 33.31      | 32.99           | 38.30            | 36.62         | 0.31     |
|                   |                  | DeepLab        | 37.42    | 37.38     | 83.88          | 92.04           | 39.86        | 27.29            | 14.41 | 39.94      | 32.95           | 36.53            | 43.27         | 0.36     |
|                   |                  | MA-Net         | 43.82    | 44.02     | 85.44          | 91.21           | 47.17        | 34.27            | 18.82 | 48.67      | 39.69           | 44.15            | 53.21         | 0.30     |
| L                 | S                | U-Net          | 11.56    | 10.63     | 96.44          | 74.30           | 15.40        | 6.57             | 1.97  | 11.81      | 7.94            | 11.86            | 10.27         | 1.50     |
|                   |                  | FPN            | 16.76    | 15.81     | 95.30          | 49.56           | 27.48        | 7.47             | 4.84  | 13.84      | 8.58            | 13.21            | 11.44         | 1.39     |
|                   |                  | DeepLab        | 8.84     | 9.01      | 95.54          | 65.53           | 14.45        | 3.99             | 1.92  | 6.75       | 4.72            | 6.57             | 5.86          | 1.35     |
|                   |                  | MA-Net         | 12.73    | 12.13     | 93.70          | 58.47           | 25.67        | 6.16             | 1.81  | 12.07      | 7.57            | 10.08            | 11.09         | 0.88     |
|                   | M                | U-Net          | 36.38    | 36.29     | 91.79          | 77.73           | 45.80        | 21.86            | 7.67  | 39.88      | 24.59           | 34.69            | 31.55         | 0.78     |
|                   |                  | FPN            | 42.22    | 41.93     | 91.84          | 63.61           | 59.94        | 27.04            | 13.08 | 43.91      | 33.15           | 48.81            | 39.00         | 1.20     |
|                   |                  | DeepLab        | 31.74    | 34.10     | 91.04          | 69.21           | 46.22        | 19.36            | 6.51  | 36.39      | 20.26           | 30.12            | 26.26         | 1.22     |
|                   |                  | MA-Net         | 34.41    | 36.35     | 90.84          | 71.19           | 54.10        | 22.09            | 6.97  | 40.42      | 25.27           | 34.41            | 32.21         | 0.44     |
|                   | L                | U-Net          | 56.87    | 60.42     | 90.61          | 89.93           | 66.75        | 44.57            | 21.02 | 62.86      | 50.09           | 57.21            | 67.81         | 1.08     |
|                   |                  | FPN            | 59.49    | 63.69     | 90.40          | 81.33           | 75.75        | 47.49            | 21.45 | 59.68      | 56.28           | 63.49            | 64.45         | 1.00     |
|                   |                  | DeepLab        | 61.76    | 64.81     | 90.80          | 82.05           | 74.87        | 51.98            | 24.86 | 64.94      | 60.06           | 68.78            | 68.43         | 1.05     |
|                   |                  | MA-Net         | 59.47    | 63.61     | 90.89          | 84.67           | 73.21        | 47.50            | 22.85 | 61.79      | 53.68           | 59.97            | 66.51         | 0.38     |

Table 3. Results for BM-2 on  $\mathcal{D}_{id}$  (highlighted) and  $\mathcal{D}_{ood}$  for single-size category  $\mathcal{T}_{pn}$ .

| Training Category | Testing Category | Training Model | Cone     |           |                |                 |              |                  |       |            |                 |                  |               | Non-cone |
|-------------------|------------------|----------------|----------|-----------|----------------|-----------------|--------------|------------------|-------|------------|-----------------|------------------|---------------|----------|
|                   |                  |                | Mask IoU | Pixel IoU | Pixel Accuracy | Pixel Precision | Pixel Recall | Panoptic Quality | mAP   | Object IoU | Object Accuracy | Object Precision | Object Recall | $A_{FP}$ |
| S + M             | S                | U-Net          | 32.50    | 30.85     | 97.84          | 79.57           | 37.36        | 21.67            | 14.14 | 30.52      | 25.34           | 34.08            | 28.33         | 0.25     |
|                   |                  | FPN            | 24.86    | 23.97     | 97.53          | 82.85           | 28.39        | 16.36            | 7.42  | 24.44      | 19.53           | 27.48            | 22.46         | 0.13     |
|                   |                  | DeepLab        | 25.06    | 25.68     | 97.77          | 85.34           | 30.06        | 17.65            | 11.67 | 24.85      | 20.63           | 27.25            | 24.85         | 0.03     |
|                   |                  | MA-Net         | 39.17    | 37.39     | 97.52          | 62.84           | 54.41        | 26.54            | 14.21 | 41.84      | 30.58           | 38.42            | 41.57         | 0.42     |
|                   | M                | U-Net          | 45.19    | 41.88     | 93.27          | 85.45           | 47.18        | 34.49            | 19.15 | 48.00      | 41.69           | 54.05            | 46.08         | 0.50     |
|                   |                  | FPN            | 36.24    | 33.26     | 92.22          | 84.74           | 37.58        | 26.20            | 13.15 | 39.57      | 32.25           | 42.61            | 37.31         | 0.26     |
|                   |                  | DeepLab        | 29.96    | 28.14     | 91.80          | 91.75           | 30.26        | 20.13            | 11.96 | 29.31      | 24.94           | 31.90            | 28.41         | 0.07     |
|                   |                  | MA-Net         | 49.86    | 50.88     | 94.06          | 81.20           | 61.02        | 38.05            | 18.00 | 55.60      | 43.67           | 50.20            | 56.56         | 0.55     |
|                   | L                | U-Net          | 32.82    | 29.90     | 82.65          | 92.01           | 31.07        | 24.13            | 14.53 | 33.21      | 29.35           | 34.88            | 34.56         | 0.05     |
|                   |                  | FPN            | 24.17    | 22.83     | 81.06          | 93.26           | 23.51        | 16.70            | 10.72 | 22.56      | 22.63           | 25.61            | 25.61         | 0.09     |
|                   |                  | DeepLab        | 18.60    | 16.48     | 79.34          | 93.39           | 16.83        | 13.61            | 8.42  | 19.94      | 16.45           | 20.44            | 19.95         | 0.05     |
|                   |                  | MA-Net         | 50.00    | 51.11     | 86.35          | 90.39           | 56.31        | 39.35            | 18.89 | 53.78      | 44.56           | 48.19            | 63.07         | 0.33     |
| M + L             | S                | U-Net          | 24.94    | 23.63     | 96.83          | 69.32           | 30.29        | 14.14            | 7.37  | 21.23      | 16.79           | 24.06            | 18.68         | 1.00     |
|                   |                  | FPN            | 19.34    | 19.01     | 96.60          | 73.26           | 25.05        | 8.21             | 7.23  | 15.24      | 8.94            | 14.33            | 11.87         | 0.65     |
|                   |                  | DeepLab        | 16.52    | 17.24     | 96.95          | 80.52           | 21.44        | 9.82             | 8.26  | 15.60      | 11.16           | 16.74            | 12.87         | 1.06     |
|                   |                  | MA-Net         | 24.41    | 22.42     | 97.02          | 76.47           | 28.04        | 13.51            | 6.36  | 21.96      | 15.71           | 23.10            | 17.55         | 0.81     |
|                   | M                | U-Net          | 47.06    | 46.28     | 92.98          | 75.76           | 55.25        | 32.41            | 14.89 | 48.40      | 37.85           | 50.29            | 43.68         | 0.70     |
|                   |                  | FPN            | 40.06    | 40.52     | 92.56          | 76.16           | 48.22        | 26.19            | 15.70 | 41.77      | 31.19           | 42.90            | 36.84         | 0.48     |
|                   |                  | DeepLab        | 40.07    | 40.49     | 92.49          | 81.37           | 47.06        | 27.67            | 10.12 | 44.56      | 31.98           | 43.67            | 37.41         | 0.51     |
|                   |                  | MA-Net         | 43.92    | 41.96     | 92.71          | 82.85           | 48.76        | 31.25            | 14.89 | 45.75      | 36.98           | 50.01            | 41.83         | 0.33     |
|                   | L                | U-Net          | 49.92    | 52.92     | 88.97          | 88.46           | 58.01        | 39.83            | 17.20 | 53.63      | 47.05           | 53.07            | 58.56         | 2.57     |
|                   |                  | FPN            | 51.83    | 53.70     | 88.67          | 88.55           | 59.06        | 41.37            | 17.94 | 54.81      | 48.26           | 56.02            | 57.57         | 2.88     |
|                   |                  | DeepLab        | 60.37    | 64.01     | 91.55          | 91.58           | 69.28        | 50.19            | 23.65 | 65.89      | 56.61           | 63.98            | 68.73         | 2.31     |
|                   |                  | MA-Net         | 57.52    | 60.06     | 90.42          | 92.17           | 64.18        | 48.82            | 23.54 | 61.74      | 57.25           | 63.24            | 67.13         | 1.76     |
| L + S             | S                | U-Net          | 15.61    | 14.35     | 97.02          | 84.55           | 18.09        | 7.80             | 5.10  | 12.39      | 9.14            | 14.34            | 10.32         | 0.93     |
|                   |                  | FPN            | 23.82    | 24.01     | 97.28          | 81.13           | 32.41        | 16.12            | 6.93  | 23.82      | 18.47           | 24.34            | 23.08         | 0.48     |
|                   |                  | DeepLab        | 18.62    | 18.95     | 97.22          | 82.84           | 22.90        | 11.15            | 5.53  | 17.85      | 13.49           | 19.31            | 16.04         | 1.19     |
|                   |                  | MA-Net         | 32.27    | 31.44     | 97.16          | 65.87           | 45.44        | 19.56            | 7.33  | 31.66      | 22.91           | 27.81            | 33.09         | 0.95     |
|                   | M                | U-Net          | 34.43    | 35.82     | 92.78          | 86.03           | 40.87        | 22.62            | 9.83  | 35.77      | 26.82           | 37.47            | 29.91         | 0.38     |
|                   |                  | FPN            | 37.92    | 37.05     | 92.63          | 85.55           | 42.08        | 28.02            | 12.42 | 40.55      | 34.11           | 44.38            | 39.48         | 0.20     |
|                   |                  | DeepLab        | 31.96    | 34.30     | 92.10          | 81.33           | 40.50        | 20.40            | 8.11  | 36.56      | 23.43           | 30.83            | 29.79         | 0.31     |
|                   |                  | MA-Net         | 49.29    | 50.29     | 92.94          | 75.99           | 63.65        | 34.61            | 16.41 | 55.66      | 37.56           | 45.75            | 53.47         | 0.23     |
|                   | L                | U-Net          | 50.51    | 52.01     | 89.13          | 91.55           | 56.26        | 42.93            | 21.49 | 52.84      | 49.93           | 58.67            | 56.80         | 2.22     |
|                   |                  | FPN            | 49.39    | 53.22     | 88.22          | 87.40           | 60.37        | 40.01            | 20.24 | 51.47      | 45.58           | 50.81            | 55.73         | 1.40     |
|                   |                  | DeepLab        | 49.69    | 57.35     | 89.76          | 86.88           | 64.73        | 39.20            | 14.86 | 52.72      | 44.78           | 49.30            | 57.57         | 2.36     |
|                   |                  | MA-Net         | 58.73    | 62.65     | 90.80          | 84.17           | 71.61        | 43.32            | 14.74 | 59.74      | 49.18           | 52.64            | 67.89         | 2.50     |

Table 4. Results for BM-2 on  $\mathcal{D}_{id}$  (highlighted) and  $\mathcal{D}_{ood}$  for multi-size category  $\mathcal{T}_{pn}$ .



| Training Region | Testing Region | Training Model | Cone     |           |                |                 |              |                  |       |            |                 |                  |               | Non-cone |
|-----------------|----------------|----------------|----------|-----------|----------------|-----------------|--------------|------------------|-------|------------|-----------------|------------------|---------------|----------|
|                 |                |                | Mask IoU | Pixel IoU | Pixel Accuracy | Pixel Precision | Pixel Recall | Panoptic Quality | mAP   | Object IoU | Object Accuracy | Object Precision | Object Recall | $A_{FP}$ |
| IP              | IP             | U-Net          | 62.62    | 65.60     | 96.75          | 89.51           | 71.99        | 52.27            | 31.84 | 73.62      | 58.50           | 68.63            | 72.12         | 0.00     |
|                 |                | FPN            | 57.42    | 59.32     | 96.33          | 88.83           | 65.23        | 44.91            | 25.66 | 63.75      | 51.05           | 64.82            | 57.57         | 0.00     |
|                 |                | DeepLab        | 57.41    | 64.37     | 96.61          | 85.27           | 72.34        | 45.88            | 29.38 | 69.45      | 49.98           | 57.94            | 68.32         | 0.00     |
|                 |                | MA-Net         | 59.32    | 64.96     | 96.45          | 84.37           | 71.98        | 47.67            | 29.37 | 72.73      | 53.55           | 62.79            | 67.8          | 0.00     |
|                 | AP             | U-Net          | 17.36    | 14.36     | 91.47          | 62.60           | 17.80        | 6.71             | 5.60  | 17.73      | 6.04            | 10.54            | 12.20         | 9.96     |
|                 |                | FPN            | 19.00    | 14.60     | 90.13          | 43.44           | 21.25        | 8.89             | 4.98  | 14.74      | 10.06           | 12.74            | 16.07         | 8.52     |
|                 |                | DeepLab        | 21.22    | 14.94     | 90.07          | 37.72           | 26.57        | 4.63             | 3.05  | 17.99      | 4.42            | 4.90             | 19.17         | 7.46     |
|                 |                | MA-Net         | 30.22    | 24.97     | 88.52          | 35.44           | 47.87        | 6.75             | 5.89  | 28.39      | 5.66            | 6.36             | 25.60         | 19.08    |
|                 | HP             | U-Net          | 30.05    | 27.92     | 89.74          | 72.56           | 35.22        | 16.87            | 7.11  | 28.85      | 19.65           | 23.59            | 30.59         | 1.31     |
|                 |                | FPN            | 22.14    | 20.64     | 89.14          | 74.23           | 25.80        | 11.06            | 5.81  | 18.29      | 13.49           | 15.81            | 19.34         | 0.94     |
|                 |                | DeepLab        | 24.54    | 24.03     | 89.55          | 68.04           | 29.27        | 11.81            | 4.29  | 25.86      | 12.85           | 14.26            | 27.89         | 0.95     |
|                 |                | MA-Net         | 34.04    | 30.93     | 85.25          | 50.10           | 54.18        | 12.36            | 4.71  | 33.21      | 12.02           | 14.36            | 35.86         | 4.73     |
| AP              | IP             | U-Net          | 7.00     | 11.82     | 32.22          | 12.95           | 86.48        | 0.79             | 1.81  | 4.15       | 0.78            | 1.15             | 1.85          | 85.26    |
|                 |                | FPN            | 13.89    | 11.20     | 82.17          | 17.89           | 27.63        | 3.04             | 3.02  | 11.50      | 2.84            | 6.36             | 5.56          | 10.84    |
|                 |                | DeepLab        | 8.24     | 6.53      | 78.24          | 10.92           | 17.76        | 0.22             | 1.11  | 1.89       | 0.23            | 0.25             | 1.85          | 10.71    |
|                 |                | MA-Net         | 9.89     | 8.24      | 62.47          | 12.10           | 42.58        | 0.61             | 2.16  | 4.21       | 0.59            | 0.73             | 2.16          | 26.54    |
|                 | AP             | U-Net          | 61.30    | 60.29     | 96.48          | 70.42           | 74.78        | 50.23            | 27.90 | 68.59      | 52.69           | 60.54            | 73.21         | 3.30     |
|                 |                | FPN            | 52.90    | 58.17     | 96.95          | 77.54           | 65.10        | 48.34            | 26.53 | 63.48      | 54.21           | 60.83            | 65.00         | 2.33     |
|                 |                | DeepLab        | 53.78    | 59.87     | 96.82          | 76.65           | 69.44        | 48.19            | 25.25 | 62.99      | 54.44           | 60.71            | 66.19         | 1.34     |
|                 |                | MA-Net         | 48.63    | 51.89     | 96.19          | 65.00           | 65.06        | 41.65            | 18.18 | 61.44      | 43.57           | 48.22            | 59.94         | 1.87     |
|                 | HP             | U-Net          | 26.04    | 22.67     | 71.75          | 29.07           | 66.11        | 7.27             | 2.69  | 20.72      | 7.09            | 8.72             | 22.32         | 30.40    |
|                 |                | FPN            | 23.26    | 21.69     | 87.68          | 55.24           | 30.88        | 9.68             | 5.29  | 19.44      | 10.95           | 13.80            | 19.97         | 4.38     |
|                 |                | DeepLab        | 19.10    | 17.96     | 86.75          | 50.37           | 26.18        | 5.97             | 3.90  | 14.42      | 6.69            | 8.42             | 15.02         | 5.20     |
|                 |                | MA-Net         | 13.49    | 14.38     | 86.87          | 51.64           | 19.95        | 4.30             | 2.02  | 11.61      | 4.75            | 5.59             | 12.06         | 6.34     |
| HP              | IP             | U-Net          | 42.62    | 44.23     | 93.79          | 74.00           | 59.09        | 24.89            | 9.99  | 54.69      | 27.18           | 45.99            | 33.49         | 0.00     |
|                 |                | FPN            | 40.02    | 33.78     | 85.67          | 66.90           | 44.59        | 24.52            | 10.73 | 47.33      | 25.82           | 47.28            | 30.31         | 0.00     |
|                 |                | DeepLab        | 40.55    | 38.44     | 86.34          | 72.64           | 46.94        | 27.37            | 11.16 | 52.15      | 29.55           | 50.43            | 33.92         | 0.00     |
|                 |                | MA-Net         | 39.50    | 43.19     | 94.25          | 73.50           | 56.95        | 24.60            | 10.68 | 48.44      | 27.67           | 47.22            | 33.03         | 0.00     |
|                 | AP             | U-Net          | 30.31    | 33.29     | 92.29          | 67.55           | 44.88        | 17.64            | 8.49  | 26.81      | 20.77           | 25.89            | 27.68         | 9.29     |
|                 |                | FPN            | 26.80    | 27.06     | 87.92          | 52.61           | 44.57        | 17.44            | 7.43  | 25.67      | 23.15           | 26.19            | 28.87         | 20.00    |
|                 |                | DeepLab        | 28.48    | 27.79     | 89.65          | 67.22           | 39.68        | 18.86            | 8.56  | 31.81      | 22.47           | 27.56            | 31.85         | 13.29    |
|                 |                | MA-Net         | 26.24    | 25.18     | 89.08          | 62.47           | 39.08        | 13.45            | 5.01  | 20.77      | 16.82           | 21.90            | 23.21         | 9.44     |
|                 | HP             | U-Net          | 48.45    | 48.51     | 93.41          | 77.77           | 58.63        | 36.34            | 18.13 | 50.38      | 42.28           | 51.18            | 49.52         | 2.66     |
|                 |                | FPN            | 47.44    | 48.59     | 90.74          | 71.01           | 64.21        | 35.64            | 16.47 | 49.67      | 42.14           | 50.85            | 50.47         | 5.95     |
|                 |                | DeepLab        | 47.14    | 47.59     | 91.34          | 76.21           | 56.85        | 34.61            | 15.07 | 49.80      | 39.01           | 46.65            | 50.54         | 4.57     |
|                 |                | MA-Net         | 44.24    | 45.65     | 93.35          | 75.80           | 57.09        | 31.12            | 14.38 | 44.66      | 36.60           | 45.22            | 44.90         | 3.06     |

Table 5. Results for BM-1 on  $\mathcal{D}_{id}$  (highlighted) and  $\mathcal{D}_{ood}$  for single-region  $\mathcal{T}_p$ .

| Training Region | Testing Region | Training Model | Cone     |           |                |                 |              |                  |       |            |                 |                  |               | Non-cone |
|-----------------|----------------|----------------|----------|-----------|----------------|-----------------|--------------|------------------|-------|------------|-----------------|------------------|---------------|----------|
|                 |                |                | Mask IoU | Pixel IoU | Pixel Accuracy | Pixel Precision | Pixel Recall | Panoptic Quality | mAP   | Object IoU | Object Accuracy | Object Precision | Object Recall | $A_{FP}$ |
| IP + AP         | IP             | U-Net          | 61.50    | 66.48     | 97.01          | 87.87           | 74.32        | 52.03            | 32.51 | 69.87      | 59.15           | 66.95            | 71.23         | 0.00     |
|                 |                | FPN            | 56.59    | 58.70     | 96.07          | 87.53           | 64.58        | 42.66            | 26.58 | 66.17      | 47.27           | 62.88            | 54.58         | 0.00     |
|                 |                | DeepLab        | 60.90    | 64.36     | 96.64          | 84.67           | 70.95        | 51.17            | 31.75 | 71.11      | 55.63           | 69.00            | 66.96         | 0.00     |
|                 |                | MA-Net         | 58.47    | 63.56     | 96.74          | 86.47           | 69.49        | 49.84            | 28.39 | 68.69      | 56.31           | 67.38            | 64.22         | 0.00     |
|                 | AP             | U-Net          | 58.92    | 61.85     | 96.87          | 81.31           | 75.19        | 52.98            | 27.07 | 69.80      | 62.13           | 67.54            | 78.81         | 1.72     |
|                 |                | FPN            | 59.29    | 60.35     | 96.82          | 77.09           | 72.28        | 51.50            | 27.62 | 62.39      | 58.49           | 65.48            | 65.60         | 1.74     |
|                 |                | DeepLab        | 53.73    | 54.45     | 96.33          | 74.81           | 67.67        | 45.62            | 25.61 | 61.44      | 49.31           | 56.33            | 66.07         | 1.67     |
|                 |                | MA-Net         | 51.51    | 53.54     | 96.17          | 60.95           | 72.16        | 39.28            | 17.02 | 59.43      | 42.01           | 48.10            | 63.69         | 1.98     |
|                 | HP             | U-Net          | 29.49    | 26.65     | 89.32          | 72.37           | 32.54        | 16.56            | 7.81  | 27.71      | 20.17           | 23.87            | 29.09         | 0.96     |
|                 |                | FPN            | 33.10    | 30.94     | 89.74          | 70.08           | 39.60        | 18.31            | 8.77  | 31.06      | 20.91           | 26.46            | 30.47         | 1.54     |
|                 |                | DeepLab        | 29.82    | 29.64     | 89.67          | 70.29           | 35.08        | 16.69            | 6.19  | 28.98      | 20.16           | 23.59            | 29.69         | 1.60     |
|                 |                | MA-Net         | 27.39    | 27.68     | 89.68          | 71.80           | 32.66        | 14.43            | 6.94  | 25.10      | 16.61           | 18.69            | 27.65         | 1.10     |
| HP + IP         | IP             | U-Net          | 58.85    | 58.41     | 96.07          | 84.29           | 65.90        | 44.36            | 26.65 | 67.89      | 46.35           | 66.54            | 52.91         | 0.00     |
|                 |                | FPN            | 57.66    | 52.00     | 88.61          | 74.34           | 63.95        | 48.66            | 26.92 | 71.01      | 53.49           | 67.79            | 61.74         | 0.00     |
|                 |                | DeepLab        | 43.94    | 46.36     | 94.62          | 75.83           | 49.39        | 32.80            | 15.98 | 49.12      | 37.55           | 48.60            | 41.23         | 0.00     |
|                 |                | MA-Net         | 60.31    | 66.09     | 96.84          | 79.02           | 78.66        | 49.03            | 28.70 | 65.66      | 54.86           | 67.78            | 62.98         | 0.00     |
|                 | AP             | U-Net          | 28.83    | 25.69     | 86.98          | 62.01           | 44.35        | 16.60            | 5.66  | 30.20      | 20.29           | 24.90            | 29.46         | 15.92    |
|                 |                | FPN            | 23.31    | 18.45     | 75.74          | 40.23           | 49.16        | 9.05             | 5.24  | 18.89      | 9.97            | 12.50            | 20.24         | 28.93    |
|                 |                | DeepLab        | 26.28    | 26.44     | 91.28          | 63.61           | 36.22        | 17.15            | 6.33  | 34.27      | 18.98           | 23.54            | 35.42         | 11.26    |
|                 |                | MA-Net         | 36.88    | 38.31     | 88.87          | 56.01           | 65.51        | 22.76            | 6.88  | 43.29      | 24.17           | 26.01            | 50.30         | 17.39    |
|                 | HP             | U-Net          | 49.65    | 50.26     | 93.21          | 75.10           | 62.85        | 38.16            | 18.04 | 53.79      | 43.24           | 51.10            | 53.90         | 3.63     |
|                 |                | FPN            | 48.47    | 48.75     | 90.99          | 70.00           | 61.13        | 35.81            | 16.07 | 51.31      | 41.23           | 47.65            | 53.13         | 4.73     |
|                 |                | DeepLab        | 46.02    | 47.94     | 93.65          | 77.01           | 57.39        | 32.74            | 13.25 | 48.65      | 37.10           | 43.59            | 49.82         | 3.44     |
|                 |                | MA-Net         | 53.55    | 54.97     | 93.53          | 71.13           | 71.95        | 38.54            | 15.68 | 54.97      | 43.01           | 48.87            | 58.62         | 3.32     |
| AP + HP         | IP             | U-Net          | 50.31    | 54.92     | 95.76          | 79.95           | 65.46        | 37.95            | 21.71 | 60.84      | 42.13           | 56.79            | 47.64         | 0.00     |
|                 |                | FPN            | 55.44    | 55.73     | 96.10          | 83.86           | 63.87        | 41.62            | 21.88 | 63.45      | 46.56           | 66.36            | 50.1          | 0.00     |
|                 |                | DeepLab        | 42.84    | 39.54     | 93.91          | 83.26           | 48.83        | 29.48            | 14.19 | 54.75      | 32.28           | 50.93            | 36.79         | 0.00     |
|                 |                | MA-Net         | 50.74    | 49.80     | 95.24          | 79.57           | 60.62        | 34.37            | 16.71 | 55.95      | 40.93           | 56.61            | 44.42         | 0.00     |
|                 | AP             | U-Net          | 35.33    | 40.46     | 94.43          | 76.45           | 49.29        | 31.37            | 17.61 | 43.56      | 35.72           | 39.11            | 42.68         | 10.03    |
|                 |                | FPN            | 45.35    | 46.30     | 94.31          | 79.74           | 54.31        | 35.64            | 21.74 | 50.92      | 39.70           | 49.70            | 49.82         | 8.70     |
|                 |                | DeepLab        | 48.83    | 48.55     | 93.57          | 72.22           | 64.70        | 44.66            | 18.93 | 60.77      | 49.14           | 57.38            | 61.01         | 8.42     |
|                 |                | MA-Net         | 50.52    | 54.94     | 94.55          | 71.33           | 72.74        | 45.68            | 20.74 | 61.35      | 50.54           | 54.11            | 65.77         | 7.58     |
|                 | HP             | U-Net          | 48.60    | 49.96     | 93.50          | 72.92           | 62.18        | 36.59            | 18.55 | 52.11      | 41.96           | 48.33            | 52.05         | 3.20     |
|                 |                | FPN            | 49.84    | 49.54     | 93.68          | 79.43           | 58.12        | 38.33            | 22.65 | 52.06      | 45.35           | 53.36            | 54.14         | 1.58     |
|                 |                | DeepLab        | 50.68    | 51.57     | 93.77          | 74.41           | 64.10        | 37.71            | 19.74 | 53.36      | 42.76           | 49.97            | 54.71         | 2.23     |
|                 |                | MA-Net         | 50.92    | 51.80     | 93.86          | 72.27           | 64.46        | 38.08            | 17.77 | 53.54      | 42.93           | 49.99            | 55.24         | 2.36     |
| IP + AP + HP    | IP             | U-Net          | 57.63    | 55.90     | 96.04          | 88.12           | 60.07        | 43.47            | 26.69 | 67.67      | 46.89           | 64.75            | 52.66         | 0.00     |
|                 |                | FPN            | 57.13    | 59.66     | 96.01          | 83.72           | 67.59        | 43.78            | 24.63 | 66.97      | 48.26           | 65.74            | 55.51         | 0.00     |
|                 |                | DeepLab        | 54.36    | 53.52     | 95.65          | 86.86           | 58.72        | 37.29            | 18.87 | 58.08      | 40.87           | 58.44            | 45.41         | 0.00     |
|                 |                | MA-Net         | 55.02    | 55.88     | 95.96          | 86.90           | 61.55        | 42.32            | 22.09 | 64.19      | 45.25           | 60.29            | 53.33         | 0.00     |
|                 | AP             | U-Net          | 54.48    | 50.87     | 94.01          | 73.59           | 67.10        | 44.62            | 27.66 | 54.02      | 53.69           | 59.17            | 61.61         | 9.45     |
|                 |                | FPN            | 47.84    | 48.94     | 93.87          | 74.32           | 60.52        | 39.56            | 21.61 | 52.21      | 44.11           | 50.89            | 54.46         | 10.58    |
|                 |                | DeepLab        | 48.26    | 49.39     | 94.08          | 71.10           | 64.71        | 40.16            | 22.92 | 53.11      | 46.67           | 50.00            | 60.12         | 9.73     |
|                 |                | MA-Net         | 53.83    | 57.92     | 96.43          | 76.17           | 69.55        | 47.61            | 23.61 | 66.01      | 49.88           | 56.55            | 65.18         | 1.12     |
|                 | HP             | U-Net          | 49.89    | 49.55     | 93.70          | 77.38           | 60.54        | 36.62            | 19.47 | 52.64      | 42.47           | 50.65            | 53.07         | 2.14     |
|                 |                | FPN            | 50.17    | 51.84     | 93.60          | 70.81           | 67.14        | 35.99            | 18.53 | 53.19      | 39.18           | 46.19            | 53.39         | 3.20     |
|                 |                | DeepLab        | 45.72    | 47.13     | 92.72          | 76.59           | 56.76        | 33.12            | 15.92 | 48.62      | 38.06           | 43.59            | 50.52         | 3.96     |
|                 |                | MA-Net         | 52.37    | 53.25     | 94.11          | 76.63           | 65.24        | 40.47            | 18.87 | 55.09      | 46.27           | 53.57            | 56.69         | 3.44     |

Table 6. Results for BM-1 on  $\mathcal{D}_{id}$  (highlighted) and  $\mathcal{D}_{ood}$  for multi-region  $\mathcal{T}_p$ .

| Training Category | Testing Category | Training Model | Cone     |           |                |                 |              |                  |       |            |                 |                  |               | Non-cone |
|-------------------|------------------|----------------|----------|-----------|----------------|-----------------|--------------|------------------|-------|------------|-----------------|------------------|---------------|----------|
|                   |                  |                | Mask IoU | Pixel IoU | Pixel Accuracy | Pixel Precision | Pixel Recall | Panoptic Quality | mAP   | Object IoU | Object Accuracy | Object Precision | Object Recall |          |
| S                 | S                | U-Net          | 26.56    | 24.68     | 96.88          | 70.36           | 29.01        | 17.04            | 8.59  | 24.99      | 21.74           | 28.00            | 23.68         | 0.30     |
|                   |                  | FPN            | 30.00    | 29.05     | 97.08          | 62.67           | 39.30        | 19.10            | 12.20 | 34.10      | 21.76           | 26.54            | 32.39         | 0.48     |
|                   |                  | DeepLab        | 29.54    | 30.56     | 97.21          | 66.39           | 37.39        | 21.15            | 9.14  | 34.46      | 24.95           | 29.57            | 32.72         | 0.26     |
|                   |                  | MA-Net         | 29.93    | 30.58     | 97.24          | 66.91           | 38.51        | 20.39            | 10.33 | 32.80      | 23.82           | 28.24            | 30.75         | 0.32     |
|                   | M                | U-Net          | 36.16    | 34.46     | 95.60          | 86.72           | 37.74        | 21.62            | 11.24 | 39.11      | 26.27           | 33.24            | 35.99         | 0.20     |
|                   |                  | FPN            | 53.46    | 48.02     | 96.43          | 86.15           | 52.11        | 30.98            | 13.58 | 49.78      | 34.51           | 47.06            | 50.56         | 0.39     |
|                   |                  | DeepLab        | 40.88    | 41.49     | 96.44          | 76.02           | 44.54        | 28.66            | 14.95 | 44.01      | 31.75           | 35.29            | 47.48         | 0.17     |
|                   |                  | MA-Net         | 41.93    | 39.83     | 96.04          | 82.33           | 43.67        | 28.77            | 10.26 | 42.26      | 33.04           | 38.45            | 42.86         | 0.33     |
|                   | L                | U-Net          | 10.63    | 10.91     | 81.04          | 70.44           | 11.15        | 3.98             | 5.08  | 5.42       | 6.06            | 6.82             | 6.82          | 0.19     |
|                   |                  | FPN            | 22.80    | 22.28     | 82.91          | 80.77           | 23.51        | 13.28            | 7.15  | 17.47      | 18.94           | 21.97            | 22.73         | 0.46     |
|                   |                  | DeepLab        | 18.65    | 19.25     | 81.99          | 80.70           | 19.68        | 13.79            | 7.91  | 18.38      | 17.95           | 18.94            | 21.97         | 0.28     |
|                   |                  | MA-Net         | 18.07    | 18.89     | 82.06          | 93.43           | 19.15        | 13.75            | 9.17  | 20.62      | 17.80           | 20.83            | 27.27         | 0.45     |
| M                 | S                | U-Net          | 21.64    | 22.35     | 95.91          | 49.27           | 32.77        | 7.66             | 11.26 | 17.53      | 7.89            | 14.21            | 12.02         | 1.70     |
|                   |                  | FPN            | 30.18    | 28.35     | 96.24          | 56.61           | 41.94        | 18.65            | 10.20 | 30.62      | 21.93           | 30.98            | 26.73         | 1.17     |
|                   |                  | DeepLab        | 27.76    | 31.39     | 96.54          | 61.04           | 45.49        | 20.27            | 11.12 | 33.31      | 22.67           | 27.88            | 27.21         | 1.17     |
|                   |                  | MA-Net         | 32.44    | 30.46     | 95.61          | 50.99           | 47.27        | 14.36            | 11.53 | 24.42      | 14.74           | 23.08            | 22.88         | 1.73     |
|                   | M                | U-Net          | 47.18    | 47.69     | 93.93          | 67.30           | 63.57        | 32.28            | 14.04 | 52.66      | 37.24           | 45.25            | 53.31         | 1.19     |
|                   |                  | FPN            | 51.33    | 51.73     | 94.97          | 77.50           | 61.96        | 40.38            | 20.35 | 55.67      | 48.29           | 56.54            | 57.76         | 0.76     |
|                   |                  | DeepLab        | 51.13    | 52.67     | 95.14          | 77.23           | 63.83        | 38.43            | 17.29 | 58.28      | 43.19           | 49.70            | 60.41         | 0.76     |
|                   |                  | MA-Net         | 51.97    | 52.89     | 94.91          | 77.20           | 64.18        | 40.88            | 16.73 | 58.35      | 48.86           | 58.18            | 59.27         | 1.48     |
|                   | L                | U-Net          | 41.63    | 43.67     | 86.65          | 83.07           | 49.41        | 26.60            | 10.38 | 42.56      | 32.99           | 38.10            | 49.24         | 1.30     |
|                   |                  | FPN            | 38.11    | 37.96     | 86.00          | 83.91           | 40.91        | 29.19            | 15.58 | 38.53      | 37.01           | 43.33            | 42.42         | 0.90     |
|                   |                  | DeepLab        | 45.58    | 49.24     | 87.55          | 84.77           | 53.45        | 36.46            | 19.61 | 58.41      | 40.06           | 44.47            | 54.92         | 0.97     |
|                   |                  | MA-Net         | 53.00    | 57.38     | 89.35          | 90.03           | 61.66        | 44.45            | 27.76 | 57.72      | 51.94           | 60.38            | 60.61         | 1.59     |
| L                 | S                | U-Net          | 15.59    | 11.93     | 91.97          | 73.41           | 21.34        | 5.73             | 3.05  | 12.70      | 6.76            | 11.54            | 9.58          | 3.78     |
|                   |                  | FPN            | 23.91    | 24.14     | 91.23          | 44.07           | 43.74        | 12.12            | 6.57  | 22.01      | 14.06           | 21.70            | 17.79         | 5.11     |
|                   |                  | DeepLab        | 23.18    | 23.40     | 92.26          | 56.19           | 42.89        | 9.65             | 6.59  | 18.24      | 10.71           | 17.31            | 12.02         | 5.17     |
|                   |                  | MA-Net         | 23.72    | 24.60     | 91.88          | 41.44           | 44.99        | 13.39            | 8.02  | 30.55      | 14.56           | 22.12            | 21.76         | 4.09     |
|                   | M                | U-Net          | 34.11    | 28.90     | 90.61          | 70.71           | 39.67        | 22.42            | 8.65  | 33.52      | 26.88           | 34.56            | 32.91         | 2.91     |
|                   |                  | FPN            | 41.92    | 38.74     | 88.21          | 55.71           | 61.16        | 21.32            | 9.96  | 32.40      | 26.41           | 30.88            | 35.99         | 4.14     |
|                   |                  | DeepLab        | 40.98    | 38.53     | 91.62          | 61.08           | 62.69        | 24.85            | 10.65 | 35.97      | 30.69           | 36.27            | 37.82         | 3.99     |
|                   |                  | MA-Net         | 42.45    | 42.44     | 92.79          | 49.20           | 66.00        | 27.91            | 9.89  | 40.63      | 32.88           | 38.73            | 44.82         | 3.39     |
|                   | L                | U-Net          | 55.82    | 58.25     | 87.79          | 85.57           | 67.06        | 46.60            | 25.31 | 58.41      | 54.38           | 61.85            | 63.82         | 3.79     |
|                   |                  | FPN            | 61.67    | 61.98     | 88.45          | 77.24           | 78.36        | 50.62            | 22.26 | 66.47      | 57.63           | 64.3             | 75.84         | 5.09     |
|                   |                  | DeepLab        | 62.52    | 63.98     | 88.98          | 76.67           | 82.22        | 49.71            | 23.42 | 62.77      | 57.62           | 64.56            | 70.18         | 4.28     |
|                   |                  | MA-Net         | 64.51    | 68.85     | 91.13          | 80.00           | 84.16        | 50.94            | 21.08 | 68.08      | 55.75           | 62.40            | 72.97         | 3.91     |

Table 7. Results for BM-2 on  $\mathcal{D}_{id}$  (highlighted) and  $\mathcal{D}_{ood}$  for single-size category  $\mathcal{T}_p$ .

| Training Category | Testing Category | Training Model | Cone     |           |                |                 |              |                  |       |            |                 |                  |               | Non-cone |
|-------------------|------------------|----------------|----------|-----------|----------------|-----------------|--------------|------------------|-------|------------|-----------------|------------------|---------------|----------|
|                   |                  |                | Mask IoU | Pixel IoU | Pixel Accuracy | Pixel Precision | Pixel Recall | Panoptic Quality | mAP   | Object IoU | Object Accuracy | Object Precision | Object Recall | $A_{FP}$ |
| S + M             | S                | U-Net          | 32.65    | 32.54     | 96.84          | 66.34           | 45.60        | 23.83            | 13.45 | 37.43      | 28.21           | 36.64            | 34.33         | 1.41     |
|                   |                  | FPN            | 21.64    | 19.95     | 96.75          | 77.80           | 23.45        | 11.08            | 10.53 | 21.85      | 13.13           | 19.79            | 16.83         | 0.46     |
|                   |                  | DeepLab        | 30.66    | 31.66     | 97.29          | 71.83           | 41.11        | 21.60            | 11.69 | 34.84      | 24.49           | 30.59            | 31.29         | 1.14     |
|                   |                  | MA-Net         | 34.60    | 35.01     | 97.25          | 63.54           | 47.05        | 22.53            | 15.60 | 36.01      | 25.65           | 30.99            | 35.54         | 1.49     |
|                   | M                | U-Net          | 53.70    | 54.59     | 94.62          | 70.96           | 73.28        | 38.61            | 16.33 | 59.33      | 44.70           | 51.06            | 60.91         | 4.28     |
|                   |                  | FPN            | 42.45    | 39.61     | 94.54          | 90.53           | 42.62        | 27.66            | 14.84 | 43.06      | 33.99           | 44.23            | 40.76         | 1.01     |
|                   |                  | DeepLab        | 51.10    | 51.70     | 95.08          | 77.11           | 63.31        | 37.44            | 18.97 | 53.76      | 42.44           | 47.81            | 56.31         | 2.67     |
|                   |                  | MA-Net         | 53.55    | 55.13     | 95.15          | 77.39           | 66.78        | 37.15            | 16.66 | 56.83      | 40.86           | 45.69            | 59.90         | 2.74     |
|                   | L                | U-Net          | 46.93    | 45.05     | 87.50          | 82.83           | 48.95        | 37.00            | 17.43 | 51.50      | 41.86           | 52.65            | 51.89         | 0.77     |
|                   |                  | FPN            | 33.00    | 31.85     | 84.94          | 89.20           | 32.55        | 25.21            | 11.35 | 34.09      | 32.58           | 39.02            | 37.88         | 0.40     |
|                   |                  | DeepLab        | 35.72    | 38.63     | 85.91          | 83.11           | 41.14        | 27.82            | 9.82  | 42.09      | 31.69           | 33.00            | 43.56         | 0.75     |
|                   |                  | MA-Net         | 51.80    | 54.29     | 88.42          | 89.20           | 59.73        | 38.23            | 19.24 | 56.47      | 41.01           | 44.67            | 58.33         | 0.97     |
| M + L             | S                | U-Net          | 29.02    | 26.06     | 95.54          | 71.13           | 35.95        | 18.29            | 8.87  | 30.77      | 20.82           | 28.55            | 26.25         | 2.32     |
|                   |                  | FPN            | 21.94    | 19.10     | 95.48          | 62.98           | 28.58        | 11.27            | 7.25  | 21.26      | 12.54           | 18.91            | 17.44         | 1.65     |
|                   |                  | DeepLab        | 35.51    | 29.91     | 95.20          | 65.54           | 50.61        | 23.22            | 11.11 | 41.13      | 25.57           | 33.43            | 38.11         | 2.45     |
|                   |                  | MA-Net         | 27.86    | 28.72     | 94.69          | 46.06           | 46.68        | 16.77            | 7.75  | 31.23      | 19.79           | 23.85            | 28.37         | 2.25     |
|                   | M                | U-Net          | 52.22    | 52.67     | 94.76          | 79.65           | 64.14        | 38.98            | 18.20 | 56.44      | 46.22           | 56.26            | 54.61         | 1.99     |
|                   |                  | FPN            | 45.55    | 43.95     | 94.32          | 81.91           | 53.34        | 31.62            | 14.57 | 47.73      | 38.69           | 47.52            | 47.60         | 1.15     |
|                   |                  | DeepLab        | 55.40    | 55.62     | 94.60          | 71.99           | 70.30        | 43.07            | 17.08 | 60.28      | 50.14           | 56.14            | 63.17         | 2.09     |
|                   |                  | MA-Net         | 49.59    | 50.54     | 94.31          | 76.50           | 64.11        | 36.45            | 18.05 | 54.67      | 42.68           | 49.39            | 55.70         | 1.87     |
|                   | L                | U-Net          | 61.63    | 62.74     | 90.89          | 86.69           | 70.60        | 50.47            | 27.10 | 61.61      | 57.98           | 64.60            | 67.00         | 3.61     |
|                   |                  | FPN            | 51.84    | 54.54     | 89.00          | 88.06           | 59.12        | 44.69            | 22.92 | 58.17      | 53.63           | 59.45            | 66.02         | 2.80     |
|                   |                  | DeepLab        | 64.36    | 67.11     | 90.97          | 83.98           | 77.64        | 51.65            | 19.56 | 67.81      | 55.80           | 60.63            | 72.80         | 4.69     |
|                   |                  | MA-Net         | 60.98    | 63.59     | 90.44          | 83.96           | 73.04        | 49.26            | 23.85 | 65.65      | 54.97           | 60.66            | 74.34         | 4.14     |
| L + S             | S                | U-Net          | 31.94    | 30.27     | 95.95          | 59.95           | 44.87        | 20.85            | 12.19 | 36.11      | 23.10           | 29.22            | 33.25         | 2.82     |
|                   |                  | FPN            | 26.01    | 24.83     | 94.38          | 61.55           | 40.27        | 14.62            | 10.81 | 25.11      | 17.67           | 25.29            | 21.11         | 4.06     |
|                   |                  | DeepLab        | 26.52    | 26.52     | 96.41          | 68.21           | 36.65        | 15.41            | 9.81  | 28.44      | 18.14           | 26.22            | 22.74         | 2.54     |
|                   |                  | MA-Net         | 33.19    | 32.33     | 96.45          | 57.88           | 47.59        | 21.23            | 12.37 | 34.69      | 23.37           | 29.59            | 33.28         | 2.37     |
|                   | M                | U-Net          | 52.29    | 49.67     | 96.17          | 70.60           | 63.37        | 31.90            | 15.00 | 50.57      | 34.40           | 39.89            | 58.12         | 1.90     |
|                   |                  | FPN            | 40.17    | 39.37     | 93.38          | 65.25           | 63.57        | 23.86            | 12.16 | 34.95      | 30.92           | 37.25            | 36.97         | 3.49     |
|                   |                  | DeepLab        | 39.68    | 45.69     | 96.20          | 79.97           | 56.90        | 30.96            | 12.51 | 49.82      | 35.98           | 41.76            | 52.66         | 1.63     |
|                   |                  | MA-Net         | 49.84    | 49.07     | 95.71          | 72.53           | 60.84        | 31.44            | 12.59 | 52.68      | 35.88           | 42.35            | 58.54         | 2.23     |
|                   | L                | U-Net          | 64.87    | 66.61     | 91.06          | 82.20           | 78.37        | 50.93            | 23.53 | 69.71      | 54.54           | 58.90            | 74.59         | 5.95     |
|                   |                  | FPN            | 61.10    | 63.40     | 89.52          | 78.31           | 78.76        | 47.69            | 25.40 | 58.50      | 55.44           | 62.77            | 66.70         | 8.78     |
|                   |                  | DeepLab        | 61.30    | 64.56     | 91.32          | 85.28           | 72.91        | 49.41            | 23.20 | 65.23      | 55.25           | 60.36            | 72.23         | 4.65     |
|                   |                  | MA-Net         | 63.26    | 65.60     | 90.90          | 81.93           | 78.18        | 47.95            | 19.35 | 66.31      | 51.76           | 55.57            | 75.93         | 6.45     |

Table 8. Results for BM-2 on  $\mathcal{D}_{id}$  (highlighted) and  $\mathcal{D}_{ood}$  for multi-size category  $\mathcal{T}_p$ .
